# Supplementary material
Source: Copernicus journal article supplement (doi:10.5194/bg-23-4305-2026)
Supplement: Supplementary file 1 [file bg-23-4305-2026-supplement.pdf]

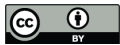

*Supplement of*

**Temperature and light regulated patterns of physiology, morphology and elemental stoichiometry in geographically distinct isolates of a cosmopolitan diatom**

Alyson M. Theseira et al.

*Correspondence to:* Katherina Petrou ([katherina.petrou@uts.edu.au](mailto:katherina.petrou@uts.edu.au))

The copyright of individual parts of the supplement might differ from the article licence.

**Table S1: Maximum quantum yield of photosystem II ( $F_V/F_M$ ).** Comparison of initial (T0) and final (T24; following 24 h incubations)  $F_V/F_M$  of *Leptocylindrus danicus* strains for all temperature and light treatments. Data represent the mean of four biological replicates  $\pm$  SD. Bold values denote statistical significance of  $F_V/F_M$  following 24 h incubations within strains ( $\alpha = 0.05$ ).

| Light treatment<br>( $\mu\text{mol photons m}^{-2} \text{ s}^{-1}$ ) | Temperature<br>( $^{\circ}\text{C}$ ) | Strain isolation<br>location | T0                | T24                                 |
|----------------------------------------------------------------------|---------------------------------------|------------------------------|-------------------|-------------------------------------|
| 100                                                                  | 22                                    | Coffs Harbour                | $0.651 \pm 0.031$ | $0.670 \pm 0.014$                   |
|                                                                      | 20                                    | Forster                      | $0.688 \pm 0.011$ | <b><math>0.718 \pm 0.014</math></b> |
|                                                                      | 18                                    | Maroubra                     | $0.644 \pm 0.006$ | <b><math>0.666 \pm 0.006</math></b> |
|                                                                      | 16                                    | Twofold Bay                  | n.d.              | n.d.                                |
| 55                                                                   | 22                                    | Coffs Harbour                | $0.663 \pm 0.011$ | $0.688 \pm 0.020$                   |
|                                                                      | 20                                    | Forster                      | $0.716 \pm 0.019$ | $0.693 \pm 0.059$                   |
|                                                                      | 18                                    | Maroubra                     | $0.686 \pm 0.009$ | $0.694 \pm 0.007$                   |
|                                                                      | 16                                    | Twofold Bay                  | $0.583 \pm 0.012$ | <b><math>0.627 \pm 0.009</math></b> |

5

**Table S2.** Macronutrient concentrations. Initial (T0) and final (T24) concentrations of macronutrients: nitrate/nitrite ( $\text{NO}_x$ ) and phosphate, following 24 h PDMPO incubation of *Leptocylindrus danicus* strains in response to temperature at each light treatment. Data represent the mean of four biological replicates  $\pm$  SD.

| Light<br>( $\mu\text{mol photons m}^{-2} \text{ s}^{-1}$ ) | Temp<br>( $^{\circ}\text{C}$ ) | Strain<br>isolation<br>location | T0                                          |                                         | T24                                         |                                         |
|------------------------------------------------------------|--------------------------------|---------------------------------|---------------------------------------------|-----------------------------------------|---------------------------------------------|-----------------------------------------|
|                                                            |                                |                                 | $\text{NO}_x$<br>( $\mu\text{mol L}^{-1}$ ) | Phosphate<br>( $\mu\text{mol L}^{-1}$ ) | $\text{NO}_x$<br>( $\mu\text{mol L}^{-1}$ ) | Phosphate<br>( $\mu\text{mol L}^{-1}$ ) |
| 100                                                        | 22                             | Coffs Harbour                   | $153.17 \pm 9.68$                           | $3.212 \pm 0.659$                       | $108.86 \pm 6.58$                           | $0.397 \pm 0.263$                       |
|                                                            | 20                             | Forster                         | $168.92 \pm 3.97$                           | $4.674 \pm 0.241$                       | $124.63 \pm 6.26$                           | $1.503 \pm 0.520$                       |
|                                                            | 18                             | Maroubra                        | $175.78 \pm 4.93$                           | $4.665 \pm 0.259$                       | $156.65 \pm 2.26$                           | $3.010 \pm 0.120$                       |
|                                                            | 16                             | Twofold Bay                     | n.d.                                        | n.d.                                    | n.d.                                        | n.d.                                    |
| 55                                                         | 22                             | Coffs Harbour                   | $151.57 \pm 1.22$                           | $4.539 \pm 0.160$                       | $136.82 \pm 5.53$                           | $2.998 \pm 0.248$                       |
|                                                            | 20                             | Forster                         | $148.50 \pm 1.65$                           | $5.207 \pm 0.183$                       | $130.20 \pm 6.36$                           | $3.376 \pm 0.346$                       |
|                                                            | 18                             | Maroubra                        | $155.23 \pm 2.73$                           | $5.732 \pm 0.058$                       | $147.33 \pm 1.35$                           | $4.124 \pm 0.417$                       |
|                                                            | 16                             | Twofold Bay                     | $161.28 \pm 1.34$                           | $6.094 \pm 0.037$                       | $161.08 \pm 3.97$                           | $5.605 \pm 0.314$                       |

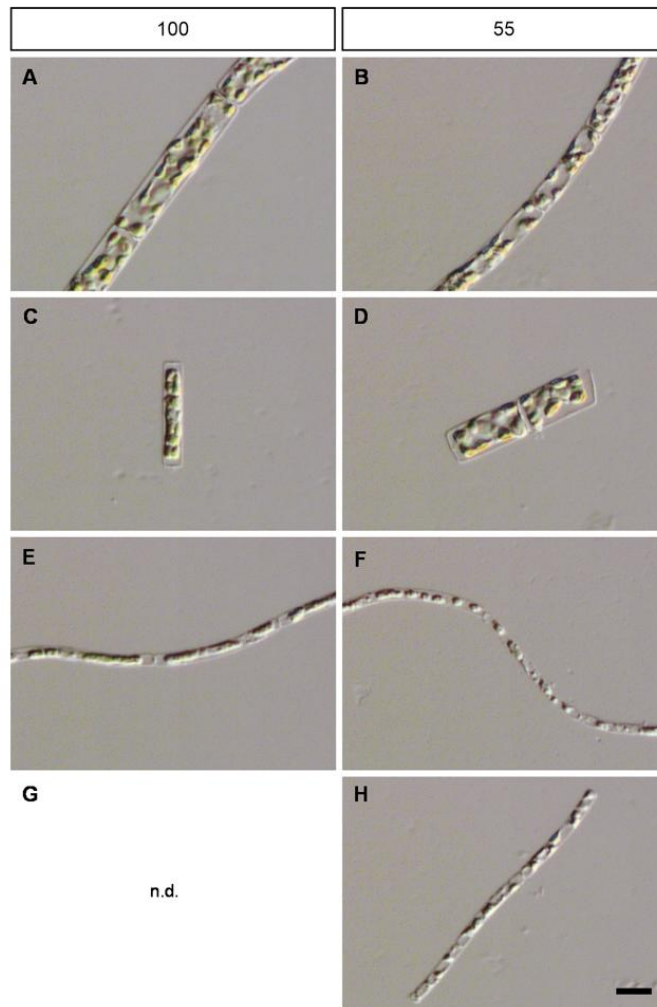

15 **Figure S1 | Strain morphology.** Micrographs of *Leptocylindrus danicus* strains used in the current study. The left column row shows strains grown under  $100 \mu\text{mol photons m}^{-2} \text{s}^{-1}$ , and right column shows strains grown under  $55 \mu\text{mol photons m}^{-2} \text{s}^{-1}$  (A, B Coffs Harbour, C, D Forster, E, F Maroubra and G, H Twofold Bay strains). Black scale bar represents  $10 \mu\text{m}$ .
